# Supplementary material
Source: publisher site journal article supplement (https://www.spandidos-publications.com/3275/downloadSupplementary)

Figure S1. miR-205-3p mimic and inhibitor do not alter cell proliferation in BEAS-2B cells. BEAS-2B normal human lung epithelial cells were transfected with miR-NC, miR-205-3p mimic or the inhibitor. Expression levels of miR-205-3p in BEAS-2B cells transfected with miR-205-3p (A) inhibitor or (B) mimic. (C) EdU staining was conducted to evaluate the effects of the miR-205-3p mimic or inhibitor on cell proliferation. Data are presented as the mean  $\pm$  SD of three independent experiments. \* $P < 0.05$  vs. miR-NC. miR, microRNA; NC, negative control; EdU, 5-Ethynyl-2'-deoxyuridine.

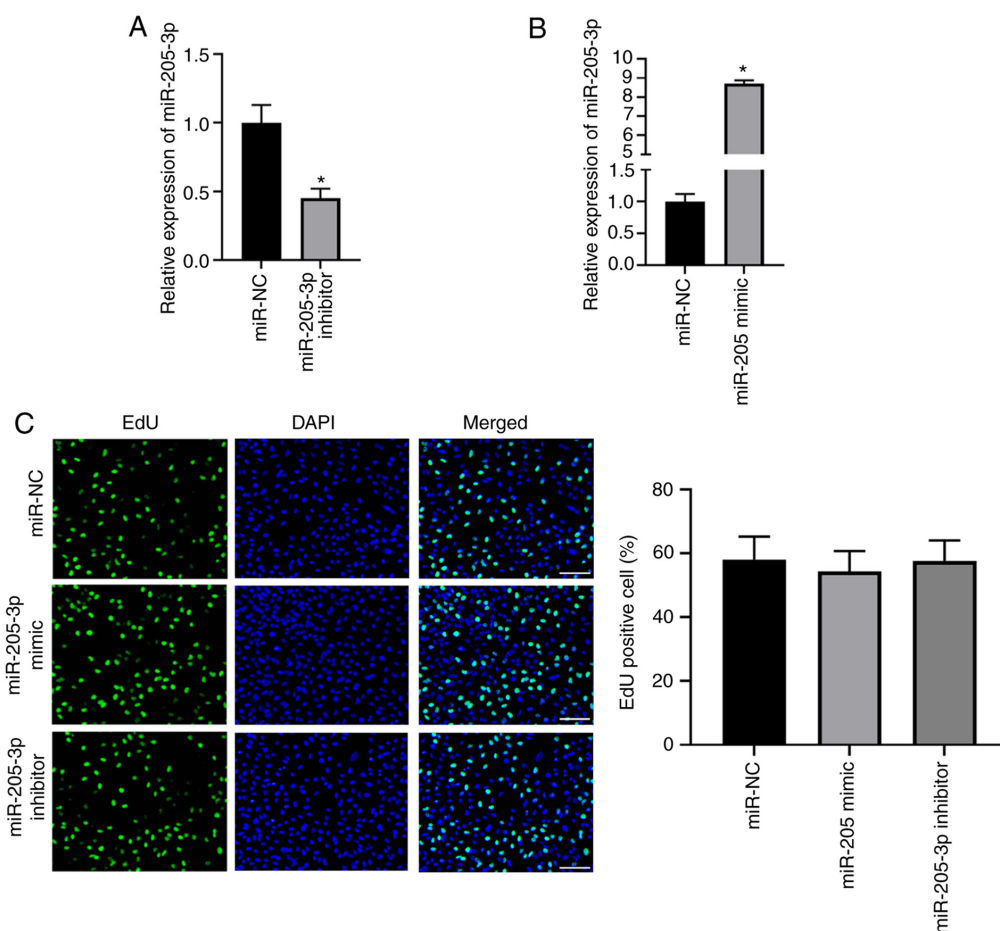

Figure S2. Venn diagram showing the number of predicted cell cycle-associated target genes of microRNA-205-3p. GO, Gene Ontology.

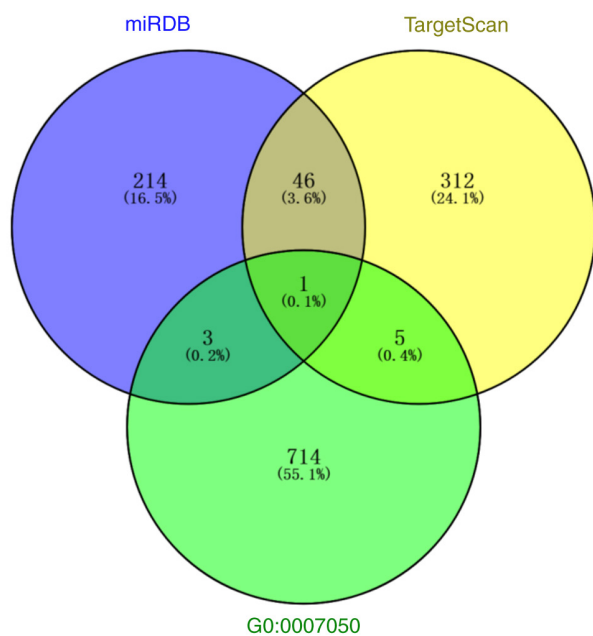

Supplement: Supplementary file 1 [file downloadSupplementary]
